# Supplementary material for: The ditetrel bond between propellane derivatives and TH 3 F
Source: Royal Society of Chemistry journal article supplement (doi:10.1039/d4nj05472e), 2025-01-01
Supplement: d4nj05472e1.pdf [file d4nj05472e1.pdf]

## The Ditetrel Bond between Propellane Derivatives and TH<sub>3</sub>F

Linhao Yang, Mianqing Duan, Liyuan Sun, Chunmei Xie, Yi Zeng\*

*School of Science, Key Laboratory of High Performance Scientific Computation,  
Xihua University, Chengdu, China 610039*

[zengy@xhu.edu.cn](mailto:zengy@xhu.edu.cn)

1. **Figure S1:** The optimized structures, binding energy (kcal mol<sup>-1</sup>) and symmetry of [1.1.1]-T binary systems (T=C, Si, Ge, Sn, Pb) at MP2/def2tzvp level. ....S2
2. **Figure S2:** Atoms in molecules (AIM) diagrams of [2.1.1]-T and [2.2.1]-T complexes. ....S2
3. **Figure S3:** Linear plot of E<sub>b</sub> with  $\rho$  and  $\nabla^2\rho$  in [2.1.1]-T binary system. ....S2
4. **Figure S4:** Linear plot of E<sub>b</sub> with  $\rho$  and  $\nabla^2\rho$  in [2.2.1]-T binary system. ....S3
5. **Figure S5:** The optimized structures, the binding energy (kcal mol<sup>-1</sup>) and symmetry of [2.1.1]-2T and [2.2.1]-2T ternary systems .....S3
6. **Figure S6:** Linear plot of E<sub>b</sub> with  $\rho$  and  $\nabla^2\rho$  in [2.1.1]-2T binary system. ....S4
7. **Figure S7:** Linear plot of E<sub>b</sub> with  $\rho$  and  $\nabla^2\rho$  in [2.2.1]-2T binary system. ....S4
8. **Table S1:** Comparison of binding energy (E<sub>b</sub>) for [1.1.1]-T complexes at wB97XD/def2-TZVP and MP2/def2-TZVP levels. ....S4
9. **Table S2:** Binding energy of ternary system (E<sub>b</sub>), sum of binding energy of the corresponding binary system ( $\Sigma E_b$ ), cooperative energy (E<sub>coop</sub>) of [1.1.1]-CT ternary complexes. ....S4
10. **Table S3:** Binding energy (E<sub>b</sub>, kcal mol<sup>-1</sup>), electron density ( $\rho$ ), Laplace electron density ( $\nabla^2\rho$ ) at the BCPs of [1.1.1]-CT ternary complexes. and their change ( $\Delta\rho$  and  $\Delta(\nabla^2\rho)$ , a.u.) related to the binary analogues..... S5
11. Cartesian coordinates of the optimized [1.1.1]-T species at MP2/def2-TZVP ....S5
12. Cartesian coordinates of the optimized species at wB97XD/def2-TZVP .....S6  
Monomer of [1.1.1], [2.1.1], [2.2.1] and TH<sub>3</sub>F. ....S6  
Binary systems of [1.1.1]-T, [2.1.1]-T, [2.2.1]-T.....S7  
Ternary systems of [1.1.1]-2T, [2.1.1]-2T, [2.2.1]-2T..... S11  
Ternary systems of [1.1.1]-CT ..... S15

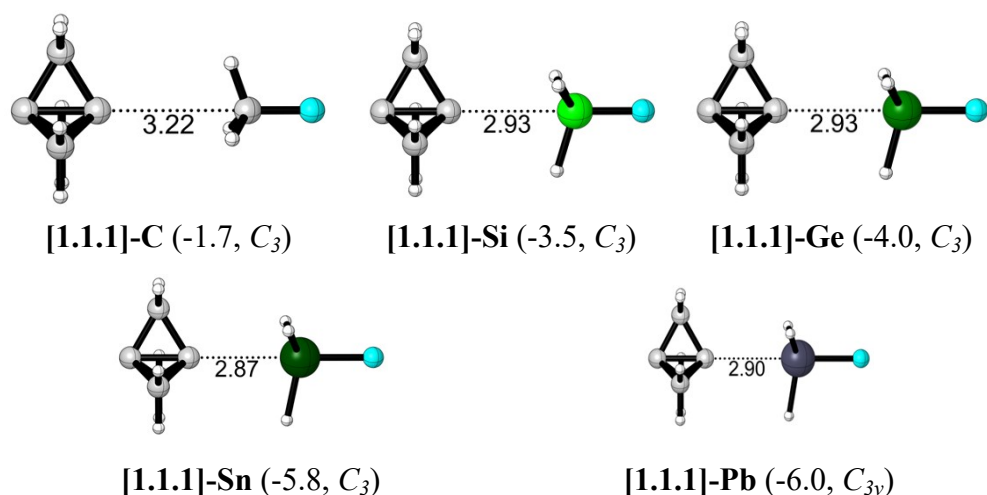

**Figure S1.** The optimized structures, binding energy (kcal mol<sup>-1</sup>) and symmetry of [1.1.1]-T binary systems (T=C, Si, Ge, Sn, Pb) at MP2/def2tzvp level.

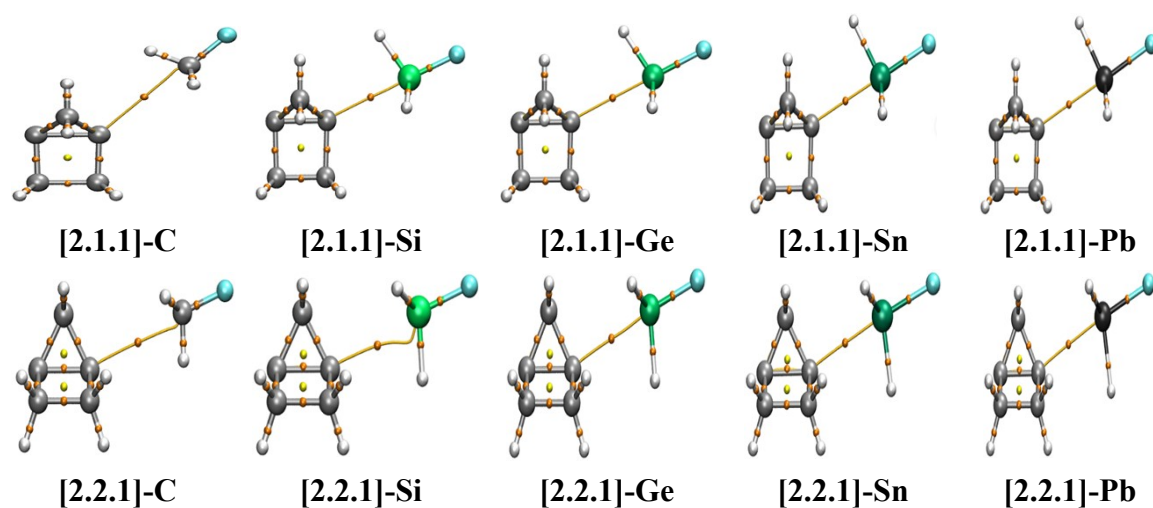

**Figure S2.** Atoms in molecules (AIM) diagrams of [2.1.1]-T and [2.2.1]-T complexes.

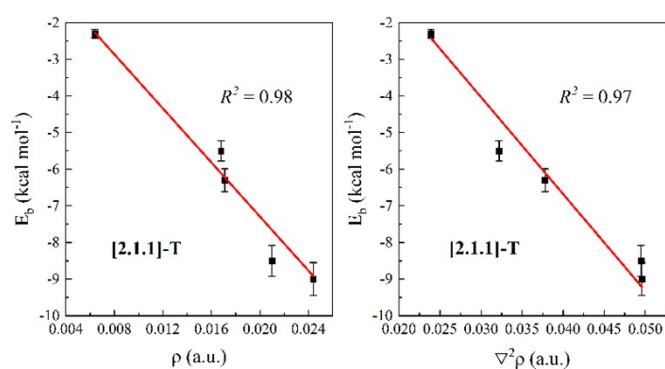

**Figure S3.** Linear plot of  $E_b$  with  $\rho$  and  $\nabla^2 \rho$  in [2.1.1]-T binary system.

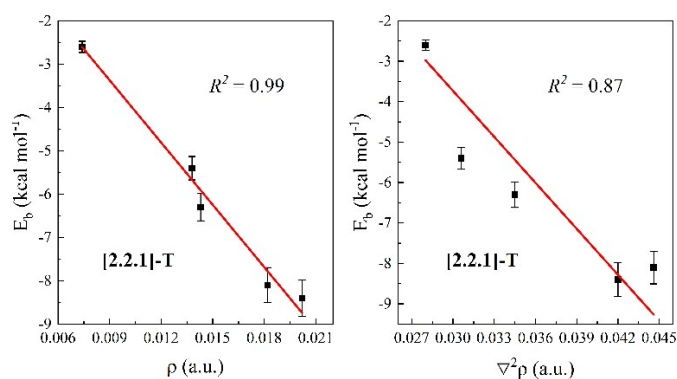

**Figure S4.** Linear plot of  $E_b$  with  $\rho$  and  $\nabla^2\rho$  in [2.2.1]-T binary system.

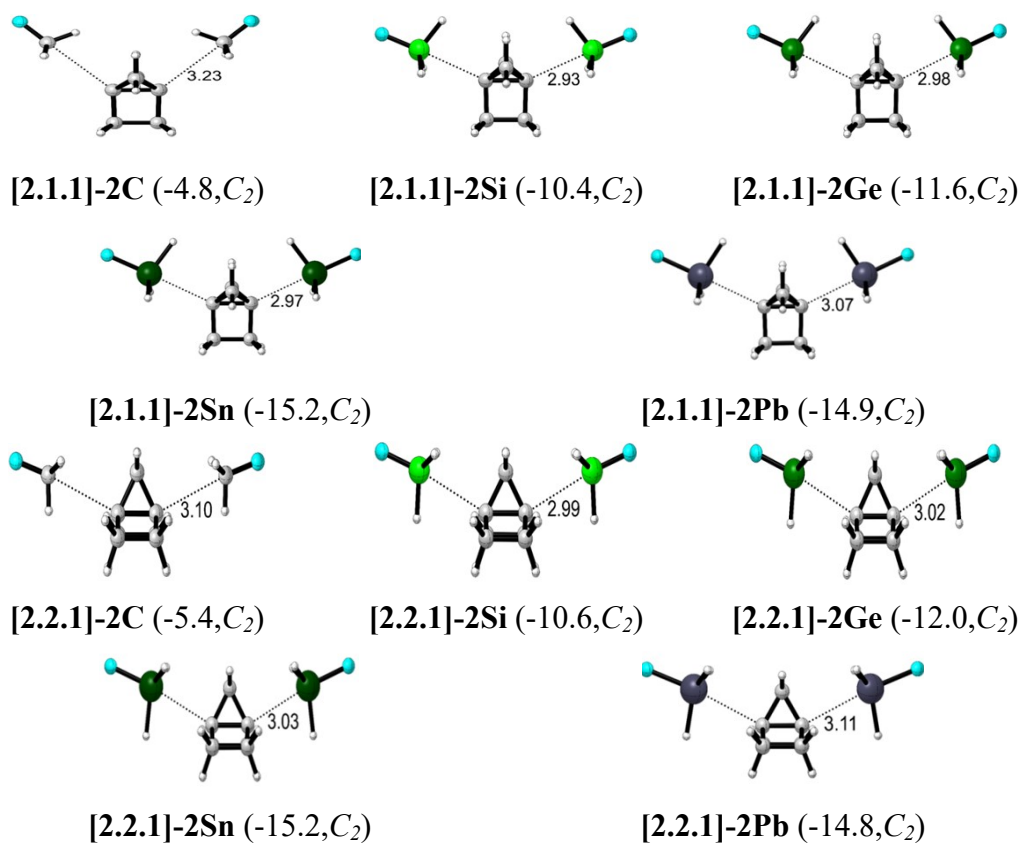

**Figure S5.** The optimized structures, the interaction energy ( $\text{kcal mol}^{-1}$ ) and symmetry of [2.1.1]-2T and [2.2.1]-2T ternary system.

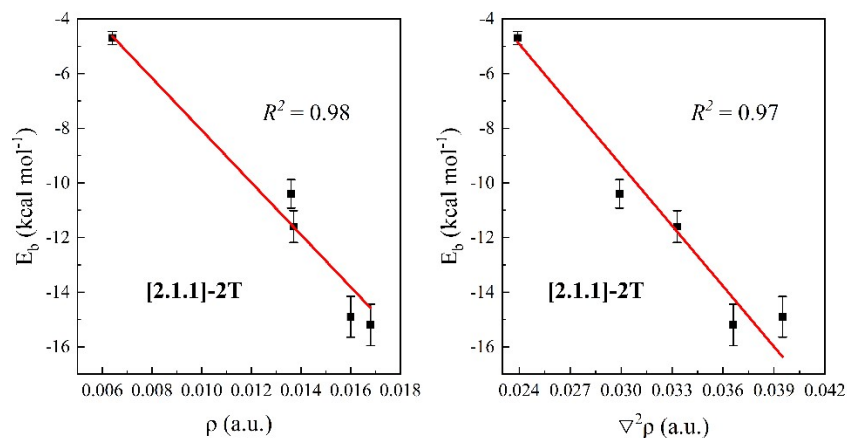

**Figure S6.** Linear plot of  $E_b$  with  $\rho$  and  $\nabla^2\rho$  in [2.1.1]-2T binary system.

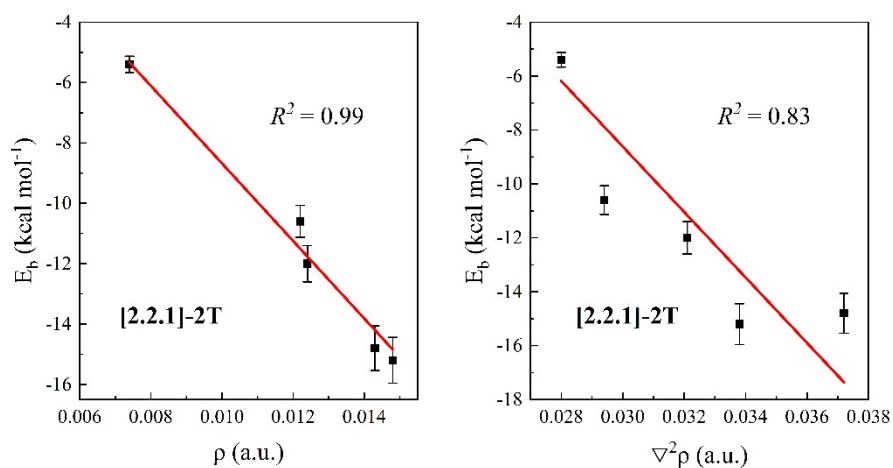

**Figure S7.** Linear plot of  $E_b$  with  $\rho$  and  $\nabla^2\rho$  in [2.2.1]-2T binary system.

**Table S1.** Comparison of binding energy ( $E_b$ , kcal mol<sup>-1</sup>) for [1.1.1]-T complexes at wB97XD/def2-TZVP and MP2/def2-TZVP levels.

|            | wB97XD | MP2  |
|------------|--------|------|
| [1.1.1]-C  | -1.9   | -1.7 |
| [1.1.1]-Si | -4.0   | -3.5 |
| [1.1.1]-Ge | -4.8   | -4.0 |
| [1.1.1]-Sn | -6.7   | -5.9 |
| [1.1.1]-Pb | -6.8   | -6.0 |

**Table S2.** Binding energy of ternary system ( $E_b$ ), sum of binding energy of the corresponding binary system ( $\Sigma E_b$ ), cooperative energy ( $E_{\text{coop}}$ ) of [1.1.1]-CT ternary complexes. All in kcal mol<sup>-1</sup>.

|             | $E_b$ | $\Sigma E_b$ | $E_{\text{coop}}$ |
|-------------|-------|--------------|-------------------|
| [1.1.1]-CSi | -5.8  | -5.9         | -0.1              |
| [1.1.1]-CGe | -6.4  | -6.7         | -0.3              |
| [1.1.1]-CSn | -8.1  | -8.6         | -0.5              |
| [1.1.1]-CPb | -8.1  | -8.7         | -0.6              |

**Table S3.** Binding energy ( $E_b$ , kcal mol<sup>-1</sup>), electron density ( $\rho$ , a.u.), Laplace electron density ( $\nabla^2\rho$ , a.u.) at the BCPs of **[1.1.1]-CT** ternary complexes and their change ( $\Delta\rho$  and  $\Delta(\nabla^2\rho)$ , a.u.) related to the binary analogues.

|                            | $E_b$ | $\rho$ | $\Delta\rho$ | $\nabla^2\rho$ | $\Delta(\nabla^2\rho)$ |
|----------------------------|-------|--------|--------------|----------------|------------------------|
| <b>[1.1.1]-CSi/C2...C</b>  | -5.8  | 0.0056 | -0.0001      | 0.0219         | 0.0002                 |
| <b>[1.1.1]-CSi/C1...Si</b> |       | 0.0108 | -0.0009      | 0.0274         | -0.0013                |
| <b>[1.1.1]-CGe/C2...C</b>  | -6.4  | 0.0054 | -0.0003      | 0.0211         | -0.0006                |
| <b>[1.1.1]-CGe/C1...Ge</b> |       | 0.0119 | -0.0005      | 0.0316         | -0.0009                |
| <b>[1.1.1]-CSn/C2...C</b>  | -8.1  | 0.0053 | -0.0004      | 0.0210         | -0.0007                |
| <b>[1.1.1]-CSn/C1...Sn</b> |       | 0.0158 | -0.0009      | 0.0369         | -0.0017                |
| <b>[1.1.1]-CPb/C2...C</b>  | -8.1  | 0.0053 | -0.0004      | 0.0209         | -0.0008                |
| <b>[1.1.1]-CPb/C1...Pb</b> |       | 0.0152 | -0.0007      | 0.0398         | -0.0016                |

**Cartesian coordinates of the optimized [1.1.1]-T species at MP2/def2-TZVP**

|                         |           |           |           |                         |           |           |           |
|-------------------------|-----------|-----------|-----------|-------------------------|-----------|-----------|-----------|
| <b>[1.1.1]</b>          |           |           |           | Ge                      | 0.000000  | 0.000000  | 0.326951  |
| C                       | 0.000000  | 0.000000  | 0.796478  | <b>SnH<sub>3</sub>F</b> |           |           |           |
| C                       | 0.000000  | 0.000000  | -0.796478 | H                       | 0.000000  | -1.626732 | 0.686142  |
| C                       | 0.000000  | 1.290434  | 0.000000  | H                       | -1.408791 | 0.813366  | 0.686142  |
| H                       | 0.919008  | 1.866953  | 0.000000  | H                       | 1.408791  | 0.813366  | 0.686142  |
| H                       | -0.919008 | 1.866953  | 0.000000  | F                       | 0.000000  | 0.000000  | -1.664277 |
| C                       | 1.117548  | -0.645217 | 0.000000  | Sn                      | 0.000000  | 0.000000  | 0.258401  |
| C                       | -1.117548 | -0.645217 | 0.000000  | <b>PbH<sub>3</sub>F</b> |           |           |           |
| H                       | 1.157324  | -1.729361 | 0.000000  | H                       | 0.000000  | 1.686782  | 0.519015  |
| H                       | 2.076333  | -0.137592 | 0.000000  | H                       | 1.460796  | -0.843391 | 0.519015  |
| H                       | -1.157324 | -1.729361 | 0.000000  | H                       | -1.460796 | -0.843391 | 0.519015  |
| H                       | -2.076333 | -0.137592 | 0.000000  | F                       | 0.000000  | 0.000000  | -1.845400 |
| <b>CH<sub>3</sub>F</b>  |           |           |           | Pb                      | 0.000000  | 0.000000  | 0.183556  |
| C                       | 0.000000  | 0.000000  | -0.633542 | <b>[1.1.1]-C</b>        |           |           |           |
| F                       | 0.000000  | 0.000000  | 0.750969  | C                       | 0.000000  | 0.000000  | -2.344783 |
| H                       | 0.000000  | 1.030256  | -0.985822 | C                       | 0.000000  | 0.000000  | -0.752285 |
| H                       | -0.892228 | -0.515128 | -0.985822 | C                       | 1.291474  | 0.000003  | -1.551616 |
| H                       | 0.892228  | -0.515128 | -0.985822 | H                       | 1.867447  | 0.919182  | -1.552601 |
| <b>SiH<sub>3</sub>F</b> |           |           |           | H                       | 1.867444  | -0.919179 | -1.552629 |
| H                       | 0.000000  | -1.397846 | 0.965213  | C                       | -0.645739 | 1.118448  | -1.551616 |
| H                       | -1.210570 | 0.698923  | 0.965213  | C                       | -0.645735 | -1.118450 | -1.551616 |
| H                       | 1.210570  | 0.698923  | 0.965213  | H                       | -1.729758 | 1.157665  | -1.552601 |
| F                       | 0.000000  | 0.000000  | -1.101806 | H                       | -0.137690 | 2.076843  | -1.552629 |
| Si                      | 0.000000  | 0.000000  | 0.501472  | H                       | -1.729754 | -1.157664 | -1.552629 |
| <b>GeH<sub>3</sub>F</b> |           |           |           | H                       | -0.137688 | -2.076847 | -1.552601 |
| H                       | 0.000000  | 1.460843  | 0.757085  | C                       | 0.000000  | 0.000000  | 2.466240  |
| H                       | 1.265127  | -0.730421 | 0.757085  | H                       | 1.029236  | 0.000103  | 2.112064  |
| H                       | -1.265127 | -0.730421 | 0.757085  | H                       | -0.514707 | 0.891293  | 2.112064  |
| F                       | 0.000000  | 0.000000  | -1.414854 | H                       | -0.514529 | -0.891396 | 2.112064  |

|                   |           |           |           |
|-------------------|-----------|-----------|-----------|
| F                 | 0.000000  | 0.000000  | 3.854839  |
| <b>[1.1.1]-Si</b> |           |           |           |
| C                 | 0.000000  | 0.000000  | -2.567804 |
| C                 | 0.000000  | 0.000000  | -0.977978 |
| C                 | 1.274008  | -0.216677 | -1.779990 |
| H                 | 1.995017  | 0.593729  | -1.777803 |
| H                 | 1.686570  | -1.219874 | -1.777796 |
| C                 | -0.449356 | 1.211661  | -1.779990 |
| C                 | -0.824652 | -0.994984 | -1.779990 |
| H                 | -1.511693 | 1.430871  | -1.777803 |
| H                 | 0.213156  | 2.070549  | -1.777796 |
| H                 | -1.899727 | -0.850676 | -1.777796 |
| H                 | -0.483324 | -2.024600 | -1.777803 |
| H                 | 0.898927  | 1.087385  | 1.530328  |
| H                 | -1.391167 | 0.234802  | 1.530328  |
| H                 | 0.492239  | -1.322186 | 1.530328  |
| F                 | 0.000000  | 0.000000  | 3.563973  |
| Si                | 0.000000  | 0.000000  | 1.951040  |

|                   |           |           |           |
|-------------------|-----------|-----------|-----------|
| <b>[1.1.1]-Ge</b> |           |           |           |
| C                 | 0.000000  | 0.000000  | -3.023364 |
| C                 | 0.000000  | 0.000000  | -1.434970 |
| C                 | -0.000338 | 1.292742  | -2.236952 |
| H                 | -0.920426 | 1.867257  | -2.235221 |
| H                 | 0.919449  | 1.867737  | -2.235222 |
| C                 | -1.119378 | -0.646664 | -2.236952 |
| C                 | 1.119716  | -0.646078 | -2.236952 |
| H                 | -1.156879 | -1.730740 | -2.235221 |
| H                 | -2.077232 | -0.137602 | -2.235222 |
| H                 | 1.157783  | -1.730135 | -2.235222 |
| H                 | 2.077305  | -0.136516 | -2.235221 |
| H                 | -1.275920 | 0.736413  | 1.112933  |
| H                 | 0.000208  | -1.473186 | 1.112933  |
| H                 | 1.275713  | 0.736773  | 1.112933  |
| F                 | 0.000000  | 0.000000  | 3.250364  |
| Ge                | 0.000000  | 0.000000  | 1.494825  |

|                   |           |           |           |
|-------------------|-----------|-----------|-----------|
| <b>[1.1.1]-Sn</b> |           |           |           |
| C                 | 0.000000  | 0.000000  | -3.273875 |
| C                 | 0.000000  | 0.000000  | -1.689123 |
| C                 | 0.369046  | 1.240287  | -2.493268 |
| H                 | -0.349541 | 2.052805  | -2.490239 |
| H                 | 1.414943  | 1.527782  | -2.490259 |
| C                 | -1.258643 | -0.300540 | -2.493268 |
| C                 | 0.889597  | -0.939747 | -2.493268 |
| H                 | -1.603011 | -1.329114 | -2.490239 |
| H                 | -2.030570 | 0.461485  | -2.490259 |
| H                 | 0.615627  | -1.989268 | -2.490259 |
| H                 | 1.952552  | -0.723691 | -2.490239 |
| H                 | -1.130132 | 1.198920  | 0.841549  |
| H                 | -0.473229 | -1.578184 | 0.841549  |
| H                 | 1.603362  | 0.379263  | 0.841549  |
| F                 | 0.000000  | 0.000000  | 3.122564  |
| Sn                | 0.000000  | 0.000000  | 1.179412  |

|                   |           |           |           |
|-------------------|-----------|-----------|-----------|
| <b>[1.1.1]-Pb</b> |           |           |           |
| C                 | 0.000000  | 0.000000  | -3.593505 |
| C                 | 0.000000  | 0.000000  | -2.008676 |
| C                 | 1.293984  | 0.000289  | -2.811579 |
| H                 | 1.867855  | 0.920801  | -2.809698 |
| H                 | 1.868266  | -0.919966 | -2.809698 |
| C                 | -0.647242 | 1.120478  | -2.811579 |
| C                 | -0.646742 | -1.120768 | -2.811579 |
| H                 | -1.731365 | 1.157209  | -2.809698 |
| H                 | -0.137419 | 2.077949  | -2.809698 |
| H                 | -1.730847 | -1.157983 | -2.809698 |
| H                 | -0.136490 | -2.078011 | -2.809698 |
| H                 | 0.848939  | 1.471146  | 0.622907  |
| H                 | -1.698519 | -0.000370 | 0.622907  |
| H                 | 0.849580  | -1.470776 | 0.622907  |
| F                 | 0.000000  | 0.000000  | 2.942669  |
| Pb                | 0.000000  | 0.000000  | 0.886914  |

**Cartesian coordinates of the optimized species at wB97XD/def2-TZVP**

|                |           |           |           |
|----------------|-----------|-----------|-----------|
| <b>[1.1.1]</b> |           |           |           |
| C              | 0.000000  | 0.000000  | 0.778348  |
| C              | 0.000000  | 0.000000  | -0.778348 |
| C              | 0.000000  | 1.295119  | 0.000000  |
| H              | 0.914729  | 1.875242  | 0.000000  |
| H              | -0.914729 | 1.875242  | 0.000000  |
| C              | 1.121606  | -0.647560 | 0.000000  |
| C              | -1.121606 | -0.647560 | 0.000000  |
| H              | 1.166643  | -1.729800 | 0.000000  |
| H              | 2.081372  | -0.145442 | 0.000000  |
| H              | -1.166643 | -1.729800 | 0.000000  |
| H              | -2.081372 | -0.145442 | 0.000000  |

|                         |           |           |           |                         |           |           |           |
|-------------------------|-----------|-----------|-----------|-------------------------|-----------|-----------|-----------|
| <b>[2.1.1]</b>          |           |           |           | H                       | -1.214333 | -0.701096 | 0.965945  |
| C                       | -0.808999 | 0.000000  | -0.367028 | Si                      | 0.000000  | 0.000000  | 0.500284  |
| C                       | 0.808999  | 0.000000  | -0.367028 |                         |           |           |           |
| C                       | 0.000000  | 1.123198  | -0.943117 |                         |           |           |           |
| H                       | 0.000000  | 2.073084  | -0.420179 | <b>GeH<sub>3</sub>F</b> |           |           |           |
| H                       | 0.000000  | 1.208880  | -2.024064 | F                       | 0.000000  | 0.000000  | -1.416702 |
| C                       | 0.000000  | -1.123198 | -0.943117 | H                       | 0.000000  | 1.469617  | 0.756316  |
| H                       | 0.000000  | -2.073084 | -0.420179 | H                       | 1.272725  | -0.734808 | 0.756316  |
| H                       | 0.000000  | -1.208880 | -2.024064 | H                       | -1.272725 | -0.734808 | 0.756316  |
| C                       | 0.767792  | 0.000000  | 1.180535  | Ge                      | 0.000000  | 0.000000  | 0.327543  |
| C                       | -0.767792 | 0.000000  | 1.180535  |                         |           |           |           |
| H                       | 1.237215  | -0.882663 | 1.610955  | <b>SnH<sub>3</sub>F</b> |           |           |           |
| H                       | -1.237215 | 0.882663  | 1.610955  | H                       | 0.000000  | 1.643489  | 0.691735  |
| H                       | 1.237215  | 0.882663  | 1.610955  | H                       | 1.423303  | -0.821745 | 0.691735  |
| H                       | -1.237215 | -0.882663 | 1.610955  | H                       | -1.423303 | -0.821745 | 0.691735  |
|                         |           |           |           | F                       | 0.000000  | 0.000000  | -1.669694 |
| <b>[2.2.1]</b>          |           |           |           | Sn                      | 0.000000  | 0.000000  | 0.259041  |
| C                       | 0.000000  | 0.782628  | 0.253037  |                         |           |           |           |
| C                       | 0.000000  | -0.782628 | 0.253037  | <b>PbH<sub>3</sub>F</b> |           |           |           |
| C                       | 0.000000  | 0.000000  | 1.515012  | F                       | 0.000000  | 0.000000  | -1.852795 |
| H                       | 0.909375  | 0.000000  | 2.103609  | H                       | 0.000000  | 1.706474  | 0.541377  |
| H                       | -0.909375 | 0.000000  | 2.103609  | H                       | 1.477850  | -0.853237 | 0.541377  |
| H                       | 2.173198  | -1.274774 | 0.087989  | H                       | -1.477850 | -0.853237 | 0.541377  |
| H                       | 1.317094  | 1.199829  | -1.455830 | Pb                      | 0.000000  | 0.000000  | 0.183549  |
| C                       | -1.364929 | 0.778118  | -0.452599 |                         |           |           |           |
| C                       | -1.364929 | -0.778118 | -0.452599 | <b>[1.1.1]-C</b>        |           |           |           |
| C                       | 1.364929  | 0.778118  | -0.452599 | C                       | 0.000000  | 0.000000  | -2.326141 |
| C                       | 1.364929  | -0.778118 | -0.452599 | C                       | 0.000000  | 0.000000  | -0.771504 |
| H                       | -1.317094 | 1.199829  | -1.455830 | C                       | -1.098349 | -0.687513 | -1.553289 |
| H                       | -1.317094 | -1.199829 | -1.455830 | H                       | -1.104382 | -1.770621 | -1.553596 |
| H                       | -2.173198 | 1.274774  | 0.087989  | H                       | -2.075182 | -0.219609 | -1.553590 |
| H                       | -2.173198 | -1.274774 | 0.087989  | C                       | 1.144578  | -0.607442 | -1.553289 |
| H                       | 1.317094  | -1.199829 | -1.455830 | C                       | -0.046229 | 1.294955  | -1.553289 |
| H                       | 2.173198  | 1.274774  | 0.087989  | H                       | 2.085594  | -0.071112 | -1.553596 |
|                         |           |           |           | H                       | 1.227778  | -1.687356 | -1.553590 |
| <b>CH<sub>3</sub>F</b>  |           |           |           | H                       | 0.847404  | 1.906965  | -1.553590 |
| C                       | 0.000000  | 0.000000  | -0.630163 | H                       | -0.981212 | 1.841733  | -1.553596 |
| F                       | 0.000000  | 0.000000  | 0.748517  | C                       | 0.000000  | 0.000000  | 2.472100  |
| H                       | 0.000000  | 1.031946  | -0.985224 | H                       | -0.865990 | -0.558007 | 2.114457  |
| H                       | -0.893691 | -0.515973 | -0.985224 | H                       | 0.916243  | -0.470966 | 2.114457  |
| H                       | 0.893691  | -0.515973 | -0.985224 | H                       | -0.050253 | 1.028973  | 2.114457  |
|                         |           |           |           | F                       | 0.000000  | 0.000000  | 3.854518  |
| <b>SiH<sub>3</sub>F</b> |           |           |           |                         |           |           |           |
| F                       | 0.000000  | 0.000000  | -1.100202 | <b>[1.1.1]-Si</b>       |           |           |           |
| H                       | 0.000000  | 1.402191  | 0.965945  | C                       | 0.000000  | 0.000000  | -2.566112 |
| H                       | 1.214333  | -0.701096 | 0.965945  | C                       | 0.000000  | 0.000000  | -1.013749 |
|                         |           |           |           | C                       | 0.217476  | 1.278191  | -1.802422 |

|                   |           |           |           |                   |           |           |           |
|-------------------|-----------|-----------|-----------|-------------------|-----------|-----------|-----------|
| H                 | -0.587868 | 2.002244  | -1.799379 | H                 | 0.381503  | -1.617468 | 0.863231  |
| H                 | 1.216959  | 1.695141  | -1.799381 | F                 | 0.000000  | 0.000000  | 3.158971  |
| C                 | -1.215684 | -0.450755 | -1.802422 | Sn                | 0.000000  | 0.000000  | 1.210928  |
| C                 | 0.998208  | -0.827435 | -1.802422 |                   |           |           |           |
| H                 | -1.440060 | -1.510231 | -1.799379 | <b>[1.1.1]-Pb</b> |           |           |           |
| H                 | -2.076515 | 0.206347  | -1.799381 | C                 | 0.000000  | 0.000000  | -3.676817 |
| H                 | 0.859556  | -1.901488 | -1.799381 | C                 | 0.000000  | 0.000000  | -2.126895 |
| H                 | 2.027928  | -0.492014 | -1.799379 | C                 | 0.000499  | 1.297963  | -2.923919 |
| H                 | -1.089528 | 0.900033  | 1.556164  | H                 | -0.914984 | 1.876314  | -2.920859 |
| H                 | -0.234687 | -1.393575 | 1.556164  | H                 | 0.916404  | 1.875631  | -2.920841 |
| H                 | 1.324215  | 0.493542  | 1.556164  | C                 | -1.124319 | -0.648549 | -2.923919 |
| F                 | 0.000000  | 0.000000  | 3.590677  | C                 | 1.123820  | -0.649414 | -2.923919 |
| Si                | 0.000000  | 0.000000  | 1.981033  | H                 | -1.167444 | -1.730556 | -2.920859 |
|                   |           |           |           | H                 | -2.082546 | -0.144186 | -2.920841 |
|                   |           |           |           | H                 | 1.166142  | -1.731445 | -2.920841 |
| <b>[1.1.1]-Ge</b> |           |           |           | H                 | 2.082428  | -0.145758 | -2.920859 |
| C                 | 0.000000  | 0.000000  | -3.040175 | H                 | -1.488223 | 0.854511  | 0.633647  |
| C                 | 0.000000  | 0.000000  | -1.488686 | H                 | 0.004084  | -1.716094 | 0.633647  |
| C                 | -1.296944 | -0.000347 | -2.279091 | H                 | 1.484139  | 0.861584  | 0.633647  |
| H                 | -1.875257 | -0.915953 | -2.276330 | F                 | 0.000000  | 0.000000  | 2.989634  |
| H                 | -1.875798 | 0.914908  | -2.276322 | Pb                | 0.000000  | 0.000000  | 0.928906  |
| C                 | 0.648773  | -1.123013 | -2.279091 |                   |           |           |           |
| C                 | 0.648171  | 1.123360  | -2.279091 | <b>[2.1.1]-C</b>  |           |           |           |
| H                 | 1.730867  | -1.166044 | -2.276330 | C                 | -0.037658 | 0.565170  | 0.000000  |
| H                 | 0.145565  | -2.081942 | -2.276322 | C                 | -1.558005 | 1.114141  | 0.000000  |
| H                 | 1.730232  | 1.167034  | -2.276322 | C                 | -0.999701 | 0.298966  | 1.123264  |
| H                 | 0.144390  | 2.081997  | -2.276330 | H                 | -0.824098 | 0.790029  | 2.073775  |
| H                 | -0.739621 | -1.281225 | 1.140930  | H                 | -1.366319 | -0.718334 | 1.208171  |
| H                 | 1.479384  | 0.000082  | 1.140930  | C                 | -0.999701 | 0.298966  | -1.123264 |
| H                 | -0.739763 | 1.281143  | 1.140930  | H                 | -0.824098 | 0.790029  | -2.073775 |
| F                 | 0.000000  | 0.000000  | 3.284537  | H                 | -1.366319 | -0.718334 | -1.208171 |
| Ge                | 0.000000  | 0.000000  | 1.527223  | C                 | -0.999701 | 2.557092  | 0.000000  |
|                   |           |           |           | C                 | 0.445195  | 2.036724  | 0.000000  |
| <b>[1.1.1]-Sn</b> |           |           |           | H                 | -1.296198 | 3.120170  | -0.882794 |
| C                 | 0.000000  | 0.000000  | -3.303560 | H                 | 1.032417  | 2.283168  | 0.882609  |
| C                 | 0.000000  | 0.000000  | -1.754050 | H                 | -1.296198 | 3.120170  | 0.882794  |
| C                 | 1.244152  | -0.369947 | -2.551956 | H                 | 1.032417  | 2.283168  | -0.882609 |
| H                 | 2.058962  | 0.343216  | -2.547651 | H                 | 1.704359  | -1.783699 | -0.892136 |
| H                 | 1.536839  | -1.412481 | -2.547661 | H                 | 1.704359  | -1.783699 | 0.892136  |
| C                 | -0.301692 | 1.262441  | -2.551956 | H                 | 0.305179  | -2.438392 | 0.000000  |
| C                 | -0.942460 | -0.892493 | -2.551956 | F                 | 1.972356  | -3.579464 | 0.000000  |
| H                 | -1.326715 | 1.611506  | -2.547651 | C                 | 1.390119  | -2.325909 | 0.000000  |
| H                 | 0.454825  | 2.037182  | -2.547661 |                   |           |           |           |
| H                 | -1.991664 | -0.624701 | -2.547661 | <b>[2.1.1]-Si</b> |           |           |           |
| H                 | -0.732247 | -1.954722 | -2.547651 | C                 | -0.156616 | 0.655588  | 0.000000  |
| H                 | 1.210017  | 1.139125  | 0.863231  | C                 | -1.117410 | 1.959152  | 0.000000  |
| H                 | -1.591519 | 0.478343  | 0.863231  |                   |           |           |           |



|                   |           |           |           |                   |           |           |           |
|-------------------|-----------|-----------|-----------|-------------------|-----------|-----------|-----------|
| C                 | -1.117410 | 0.986303  | 1.123449  | H                 | 0.037754  | -2.215226 | -2.075607 |
| H                 | -0.700629 | 1.298068  | 2.074203  | H                 | 1.577306  | -1.775872 | -1.197714 |
| H                 | -1.976966 | 0.329856  | 1.201485  | C                 | -1.317714 | -3.352880 | 0.000000  |
| C                 | -1.117410 | 0.986303  | -1.123449 | C                 | -1.718385 | -1.868836 | 0.000000  |
| H                 | -0.700629 | 1.298068  | -2.074203 | H                 | -1.605092 | -3.917138 | -0.884173 |
| H                 | -1.976966 | 0.329856  | -1.201485 | H                 | -2.256101 | -1.530817 | 0.883776  |
| C                 | 0.135886  | 2.860318  | 0.000000  | H                 | -1.605092 | -3.917138 | 0.884173  |
| C                 | 1.051787  | 1.626419  | 0.000000  | H                 | -2.256101 | -1.530817 | -0.883776 |
| H                 | 0.198495  | 3.492003  | -0.883548 | H                 | -0.656240 | 1.197945  | -1.443488 |
| H                 | 1.676406  | 1.506913  | 0.883325  | H                 | -0.656240 | 1.197945  | 1.443488  |
| H                 | 0.198495  | 3.492003  | 0.883548  | H                 | 1.831241  | 0.806247  | 0.000000  |
| H                 | 1.676406  | 1.506913  | -0.883325 | F                 | 0.538047  | 3.298571  | 0.000000  |
| Si                | 0.472395  | -2.106921 | 0.000000  | Sn                | 0.225813  | 1.367829  | 0.000000  |
| H                 | 1.066753  | -1.544063 | -1.228409 |                   |           |           |           |
| H                 | 1.066753  | -1.544063 | 1.228409  |                   |           |           |           |
| H                 | -1.003224 | -2.067790 | 0.000000  |                   |           |           |           |
| F                 | 0.865402  | -3.671707 | 0.000000  |                   |           |           |           |
| <b>[2.1.1]-Ge</b> |           |           |           | <b>[2.1.1]-Pb</b> |           |           |           |
| C                 | -0.244602 | 1.129819  | 0.000000  | C                 | -0.294162 | -1.819638 | 0.000000  |
| C                 | -1.206848 | 2.430509  | 0.000000  | C                 | 0.148185  | -3.376770 | 0.000000  |
| C                 | -1.206848 | 1.458748  | 1.123771  | C                 | 0.494401  | -2.477060 | 1.124522  |
| H                 | -0.791154 | 1.771541  | 2.074627  | H                 | -0.003688 | -2.625184 | 2.075528  |
| H                 | -2.066084 | 0.801746  | 1.201707  | H                 | 1.529574  | -2.162844 | 1.200665  |
| C                 | -1.206848 | 1.458748  | -1.123771 | C                 | 0.494401  | -2.477060 | -1.124522 |
| H                 | -0.791154 | 1.771541  | -2.074627 | H                 | -0.003688 | -2.625184 | -2.075528 |
| H                 | -2.066084 | 0.801746  | -1.201707 | H                 | 1.529574  | -2.162844 | -1.200665 |
| C                 | 0.043897  | 3.335087  | 0.000000  | C                 | -1.336658 | -3.791469 | 0.000000  |
| C                 | 0.962431  | 2.103305  | 0.000000  | C                 | -1.765988 | -2.316236 | 0.000000  |
| H                 | 0.104900  | 3.966816  | -0.883542 | H                 | -1.613712 | -4.361549 | -0.883839 |
| H                 | 1.587471  | 1.985525  | 0.883247  | H                 | -2.310674 | -1.988532 | 0.883397  |
| H                 | 0.104900  | 3.966816  | 0.883542  | H                 | -1.613712 | -4.361549 | 0.883839  |
| H                 | 1.587471  | 1.985525  | -0.883247 | H                 | -2.310674 | -1.988532 | -0.883397 |
| H                 | 1.009366  | -1.161021 | -1.284737 | H                 | -0.731816 | 0.956346  | -1.487288 |
| H                 | 1.009366  | -1.161021 | 1.284737  | H                 | -0.731816 | 0.956346  | 1.487288  |
| H                 | -1.163150 | -1.672428 | 0.000000  | H                 | 1.824336  | 0.554070  | 0.000000  |
| F                 | 0.767075  | -3.401591 | 0.000000  | F                 | 0.494401  | 3.128936  | 0.000000  |
| Ge                | 0.366356  | -1.685618 | 0.000000  | Pb                | 0.165190  | 1.087786  | 0.000000  |
| <b>[2.1.1]-Sn</b> |           |           |           | <b>[2.2.1]-C</b>  |           |           |           |
| C                 | -0.238931 | -1.395392 | 0.000000  | C                 | -1.790499 | 0.001339  | 0.540311  |
| C                 | 0.172339  | -2.963121 | 0.000000  | C                 | -0.351967 | -0.001128 | -0.072669 |
| C                 | 0.538047  | -2.076771 | 1.124420  | C                 | -0.579157 | -0.000786 | 1.396705  |
| H                 | 0.037754  | -2.215226 | 2.075607  | H                 | -0.346423 | 0.908307  | 1.938014  |
| H                 | 1.577306  | -1.775872 | 1.197714  | H                 | -0.349536 | -0.910712 | 1.937943  |
| C                 | 0.538047  | -2.076771 | -1.124420 | H                 | 0.041332  | 2.171282  | -0.415412 |
|                   |           |           |           | H                 | -2.842730 | 1.322115  | -0.866020 |
|                   |           |           |           | C                 | -2.066296 | -1.363838 | -0.108612 |
|                   |           |           |           | C                 | -0.634464 | -1.366046 | -0.719082 |
|                   |           |           |           | C                 | -2.061579 | 1.367512  | -0.108482 |

|                   |           |           |           |                   |           |           |           |
|-------------------|-----------|-----------|-----------|-------------------|-----------|-----------|-----------|
| C                 | -0.629758 | 1.364790  | -0.719001 | C                 | -1.217288 | -0.958852 | -1.360459 |
| H                 | -2.847256 | -1.315650 | -0.866174 | C                 | -1.217288 | -2.511533 | 1.359710  |
| H                 | -0.639002 | -1.319422 | -1.807339 | C                 | -1.217288 | -0.958852 | 1.360459  |
| H                 | -2.311621 | -2.170606 | 0.584544  | H                 | -2.217818 | -2.937760 | -1.308332 |
| H                 | 0.033800  | -2.174881 | -0.415503 | H                 | -2.217468 | -0.531983 | -1.304239 |
| H                 | -0.634506 | 1.318232  | -1.807262 | H                 | -0.673925 | -3.005926 | -2.166433 |
| H                 | -2.304063 | 2.175068  | 0.584757  | H                 | -0.681001 | -0.466834 | -2.174892 |
| H                 | 2.351593  | 0.004310  | -0.994834 | H                 | -2.217468 | -0.531983 | 1.304239  |
| H                 | 2.416046  | 0.888266  | 0.554722  | H                 | -0.673925 | -3.005926 | 2.166433  |
| H                 | 2.416161  | -0.895874 | 0.545361  | H                 | -0.740136 | 1.915586  | 0.000000  |
| F                 | 4.132103  | -0.000607 | -0.038696 | H                 | 1.331907  | 1.118421  | 1.284925  |
| C                 | 2.751600  | -0.001003 | 0.020074  | H                 | 1.331907  | 1.118421  | -1.284925 |
| <b>[2.2.1]-Si</b> |           |           |           | F                 | 1.412128  | 3.377767  | 0.000000  |
| C                 | -0.313647 | -2.088271 | 0.000000  | Ge                | 0.780069  | 1.738496  | 0.000000  |
| C                 | -0.303967 | -0.502785 | 0.000000  | <b>[2.2.1]-Sn</b> |           |           |           |
| C                 | 0.946354  | -1.326056 | 0.000000  | C                 | 0.631651  | 2.772898  | 0.000000  |
| H                 | 1.533910  | -1.319498 | 0.910065  | C                 | 0.611861  | 1.171734  | 0.000000  |
| H                 | 1.533910  | -1.319498 | -0.910065 | C                 | -0.628919 | 2.028440  | 0.000000  |
| H                 | -0.489571 | -0.040870 | 2.173343  | H                 | -1.215661 | 2.020746  | 0.910769  |
| H                 | -2.026264 | -2.512718 | 1.307008  | H                 | -1.215661 | 2.020746  | -0.910769 |
| C                 | -1.025791 | -2.086232 | -1.359086 | H                 | 0.816656  | 0.738150  | 2.178297  |
| C                 | -1.025791 | -0.533617 | -1.359504 | H                 | 2.345792  | 3.204059  | 1.300041  |
| C                 | -1.025791 | -2.086232 | 1.359086  | C                 | 1.347330  | 2.774233  | -1.354753 |
| C                 | -1.025791 | -0.533617 | 1.359504  | C                 | 1.347330  | 1.224480  | -1.356861 |
| H                 | -2.026264 | -2.512718 | -1.307008 | C                 | 1.347330  | 2.774233  | 1.354753  |
| H                 | -2.025980 | -0.106789 | -1.302585 | C                 | 1.347330  | 1.224480  | 1.356861  |
| H                 | -0.483215 | -2.580429 | -2.166614 | H                 | 2.345792  | 3.204059  | -1.300041 |
| H                 | -0.489571 | -0.040870 | -2.173343 | H                 | 2.345649  | 0.795023  | -1.293497 |
| H                 | -2.025980 | -0.106789 | 1.302585  | H                 | 0.802571  | 3.267000  | -2.160977 |
| H                 | -0.483215 | -2.580429 | 2.166614  | H                 | 0.816656  | 0.738150  | -2.178297 |
| H                 | -0.513518 | 2.252132  | 0.000000  | H                 | 2.345649  | 0.795023  | 1.293497  |
| H                 | 1.470394  | 1.500995  | 1.227433  | H                 | 0.802571  | 3.267000  | 2.160977  |
| H                 | 1.470394  | 1.500995  | -1.227433 | H                 | 1.026219  | -1.730700 | 0.000000  |
| F                 | 1.530238  | 3.646726  | 0.000000  | H                 | -1.293030 | -0.812290 | 1.446839  |
| Si                | 0.959240  | 2.141915  | 0.000000  | H                 | -1.293030 | -0.812290 | -1.446839 |
| <b>[2.2.1]-Ge</b> |           |           |           | F                 | -1.367332 | -3.238200 | 0.000000  |
| C                 | -0.506365 | -2.512246 | 0.000000  | Sn                | -0.646953 | -1.427477 | 0.000000  |
| C                 | -0.496016 | -0.928616 | 0.000000  | <b>[2.2.1]-Pb</b> |           |           |           |
| C                 | 0.754936  | -1.752555 | 0.000000  | C                 | 0.788617  | 3.158427  | 0.000000  |
| H                 | 1.342482  | -1.747040 | 0.910165  | C                 | 0.771720  | 1.567819  | 0.000000  |
| H                 | 1.342482  | -1.747040 | -0.910165 | C                 | -0.474478 | 2.410024  | 0.000000  |
| H                 | -0.681001 | -0.466834 | 2.174892  | H                 | -1.061669 | 2.406589  | 0.910560  |
| H                 | -2.217818 | -2.937760 | 1.308332  | H                 | -1.061669 | 2.406589  | -0.910560 |
| C                 | -1.217288 | -2.511533 | -1.359710 | H                 | 0.969199  | 1.121649  | 2.180170  |

|    |           |           |           |    |           |           |           |
|----|-----------|-----------|-----------|----|-----------|-----------|-----------|
| H  | 2.500370  | 3.587975  | 1.305210  | H  | -0.915820 | 0.007148  | 1.967437  |
| C  | 1.500808  | 3.160258  | -1.357651 | C  | 1.123782  | -0.008502 | -0.556897 |
| C  | 1.500808  | 1.609211  | -1.359843 | C  | -1.123782 | 0.008502  | -0.556897 |
| C  | 1.500808  | 3.160258  | 1.357651  | H  | 1.165853  | -0.008905 | -1.638920 |
| C  | 1.500808  | 1.609211  | 1.359843  | H  | 2.082016  | -0.016084 | -0.052675 |
| H  | 2.500370  | 3.587975  | -1.305210 | H  | -1.165853 | 0.008905  | -1.638920 |
| H  | 2.500109  | 1.181298  | -1.299513 | H  | -2.082016 | 0.016084  | -0.052675 |
| H  | 0.956058  | 3.654151  | -2.163307 | H  | -1.218683 | 3.414966  | 0.684794  |
| H  | 0.969199  | 1.121649  | -2.180170 | H  | 1.224674  | 3.418195  | 0.684038  |
| H  | 2.500109  | 1.181298  | 1.299513  | H  | 0.002364  | 3.318639  | -1.429223 |
| H  | 0.956058  | 3.654151  | 2.163307  | F  | 0.000000  | 5.423437  | -0.114981 |
| H  | 1.199884  | -1.484308 | 0.000000  | Si | 0.002271  | 3.817990  | -0.040070 |
| H  | -1.203271 | -0.567558 | 1.492129  | Si | -0.002271 | -3.817990 | -0.040070 |
| H  | -1.203271 | -0.567558 | -1.492129 | H  | 1.218683  | -3.414966 | 0.684794  |
| F  | -1.248414 | -3.065945 | 0.000000  | H  | -0.002364 | -3.318639 | -1.429223 |
| Pb | -0.510003 | -1.143191 | 0.000000  | H  | -1.224674 | -3.418195 | 0.684038  |
|    |           |           |           | F  | 0.000000  | -5.423437 | -0.114981 |

### [1.1.1]-2C

|   |           |           |           |
|---|-----------|-----------|-----------|
| C | 0.376191  | -0.679548 | -0.093760 |
| C | -0.376191 | 0.679548  | -0.093760 |
| C | 0.000000  | 0.000000  | 1.202376  |
| H | -0.800878 | -0.442233 | 1.782192  |
| H | 0.800878  | 0.442233  | 1.782192  |
| C | -0.983387 | -0.541014 | -0.741971 |
| C | 0.983387  | 0.541014  | -0.741971 |
| H | -1.022856 | -0.562858 | -1.824122 |
| H | -1.823321 | -1.005044 | -0.239448 |
| H | 1.022856  | 0.562858  | -1.824122 |
| H | 1.823321  | 1.005044  | -0.239448 |
| H | 0.523263  | 3.438787  | 0.768768  |
| H | -1.162739 | 3.638396  | 0.222937  |
| H | 0.164300  | 3.625320  | -0.970300 |
| F | 0.000000  | 5.292440  | 0.159821  |
| H | -0.523263 | -3.438787 | 0.768768  |
| H | -0.164300 | -3.625320 | -0.970300 |
| H | 1.162739  | -3.638396 | 0.222937  |
| F | 0.000000  | -5.292440 | 0.159821  |
| C | -0.126248 | 3.922740  | 0.038140  |
| C | 0.126248  | -3.922740 | 0.038140  |

### [1.1.1]-2Si

|   |           |           |          |
|---|-----------|-----------|----------|
| C | -0.006025 | -0.774266 | 0.092080 |
| C | 0.006025  | 0.774266  | 0.092080 |
| C | 0.000000  | 0.000000  | 1.389754 |
| H | 0.915820  | -0.007148 | 1.967437 |

### [1.1.1]-2Ge

|    |           |           |           |
|----|-----------|-----------|-----------|
| C  | -0.000592 | -0.004819 | 0.773508  |
| C  | -0.000592 | -0.004819 | -0.773508 |
| C  | 1.254870  | -0.335931 | 0.000000  |
| H  | 2.046808  | 0.402487  | 0.000000  |
| H  | 1.579601  | -1.368876 | 0.000000  |
| C  | -0.341574 | 1.248015  | 0.000000  |
| C  | -0.915072 | -0.926519 | 0.000000  |
| H  | -1.377010 | 1.564712  | 0.000000  |
| H  | 0.390657  | 2.045679  | 0.000000  |
| H  | -1.972000 | -0.691251 | 0.000000  |
| H  | -0.671597 | -1.981574 | 0.000000  |
| H  | 0.386869  | -1.425282 | -3.438202 |
| H  | 1.041450  | 1.047804  | -3.432256 |
| H  | -1.427573 | 0.378101  | -3.433816 |
| Ge | 0.000242  | 0.001167  | -3.832035 |
| Ge | 0.000242  | 0.001167  | 3.832035  |
| H  | 1.041450  | 1.047804  | 3.432256  |
| H  | 0.386869  | -1.425282 | 3.438202  |
| H  | -1.427573 | 0.378101  | 3.433816  |
| F  | 0.000242  | 0.005405  | 5.585586  |
| F  | 0.000242  | 0.005405  | -5.585586 |

### [1.1.1]-2Sn

|   |           |           |           |
|---|-----------|-----------|-----------|
| C | 0.000164  | 0.771992  | 0.131780  |
| C | -0.000164 | -0.771992 | 0.131780  |
| C | -1.125602 | 0.000229  | -0.518413 |

|                    |           |           |           |                    |           |           |           |
|--------------------|-----------|-----------|-----------|--------------------|-----------|-----------|-----------|
| H                  | -1.166118 | 0.000250  | -1.600374 | H                  | -1.170519 | 1.712584  | 0.957989  |
| H                  | -2.083161 | 0.000429  | -0.013176 | H                  | -0.681536 | 0.996651  | -0.643881 |
| C                  | 1.125602  | -0.000229 | -0.518413 | C                  | 0.633855  | -0.927331 | 0.437854  |
| C                  | 0.000000  | 0.000000  | 1.431469  | H                  | 1.170519  | -1.712584 | 0.957989  |
| H                  | 2.083161  | -0.000429 | -0.013176 | H                  | 0.681536  | -0.996651 | -0.643881 |
| H                  | 1.166118  | -0.000250 | -1.600374 | C                  | -0.633855 | -0.433436 | 2.563214  |
| H                  | 0.916431  | -0.000205 | 2.007914  | C                  | 0.633855  | 0.433436  | 2.563214  |
| H                  | -0.916431 | 0.000205  | 2.007914  | H                  | -0.522857 | -1.427070 | 2.992788  |
| H                  | -1.434036 | -3.505700 | 0.822622  | H                  | 0.522857  | 1.427070  | 2.992788  |
| H                  | 0.000578  | -3.367886 | -1.655363 | H                  | -1.519507 | 0.030164  | 2.993149  |
| H                  | 1.433378  | -3.505532 | 0.823683  | H                  | 1.519507  | -0.030164 | 2.993149  |
| H                  | -0.000578 | 3.367886  | -1.655363 | H                  | 3.170775  | 1.034273  | -0.635955 |
| H                  | -1.433378 | 3.505532  | 0.823683  | H                  | 2.215824  | 2.541500  | -0.606617 |
| H                  | 1.434036  | 3.505700  | 0.822622  | H                  | 1.751726  | 1.212497  | -1.702601 |
| F                  | -0.000161 | 5.776048  | -0.131899 | F                  | 3.394833  | 2.263608  | -2.226065 |
| F                  | 0.000161  | -5.776048 | -0.131899 | H                  | -1.751726 | -1.212497 | -1.702601 |
| Sn                 | 0.000000  | -3.838715 | -0.023456 | H                  | -3.170775 | -1.034273 | -0.635955 |
| Sn                 | 0.000000  | 3.838715  | -0.023456 | H                  | -2.215824 | -2.541500 | -0.606617 |
| <b>[1.1.1]-2Pb</b> |           |           |           | F                  | -3.394833 | -2.263608 | -2.226065 |
| C                  | 0.000070  | 0.772172  | -0.012095 | C                  | 2.589275  | 1.733964  | -1.236987 |
| C                  | -0.000070 | -0.772172 | -0.012095 | C                  | -2.589275 | -1.733964 | -1.236987 |
| C                  | -1.125836 | 0.000098  | -0.662034 | <b>[2.1.1]-2Si</b> |           |           |           |
| H                  | -1.167199 | 0.000113  | -1.743938 | C                  | 0.000358  | 0.808228  | 0.581270  |
| H                  | -2.083410 | 0.000185  | -0.156753 | C                  | -0.000358 | -0.808228 | 0.581270  |
| C                  | 1.125836  | -0.000098 | -0.662034 | C                  | -1.123813 | 0.000472  | 0.002630  |
| C                  | 0.000000  | 0.000000  | 1.287881  | H                  | -2.074856 | 0.000914  | 0.522135  |
| H                  | 2.083410  | -0.000185 | -0.156753 | H                  | -1.198418 | 0.000519  | -1.079229 |
| H                  | 1.167199  | -0.000113 | -1.743938 | C                  | 1.123813  | -0.000472 | 0.002630  |
| H                  | 0.916318  | -0.000084 | 1.864613  | H                  | 2.074856  | -0.000914 | 0.522135  |
| H                  | -0.916318 | 0.000084  | 1.864613  | H                  | 1.198418  | -0.000519 | -1.079229 |
| H                  | -1.483102 | -3.587924 | 0.856459  | C                  | -0.000343 | -0.768572 | 2.127127  |
| H                  | -0.000060 | -3.600254 | -1.712408 | C                  | 0.000343  | 0.768572  | 2.127127  |
| H                  | 1.483138  | -3.587844 | 0.856369  | H                  | 0.883184  | -1.238493 | 2.554173  |
| H                  | 0.000060  | 3.600254  | -1.712408 | H                  | -0.883184 | 1.238493  | 2.554173  |
| H                  | -1.483138 | 3.587844  | 0.856369  | H                  | -0.884293 | -1.237704 | 2.554163  |
| H                  | 1.483102  | 3.587924  | 0.856459  | H                  | 0.884293  | 1.237704  | 2.554163  |
| F                  | -0.000058 | 5.962036  | 0.011252  | H                  | 1.222620  | 3.367050  | 0.210393  |
| F                  | 0.000058  | -5.962036 | 0.011252  | H                  | -1.224094 | 3.366161  | 0.208107  |
| Pb                 | 0.000000  | 3.910595  | 0.001409  | H                  | 0.001358  | 2.562539  | -1.757555 |
| Pb                 | 0.000000  | -3.910595 | 0.001409  | F                  | 0.000017  | 4.977230  | -1.218253 |
| <b>[2.1.1]-2C</b>  |           |           |           | H                  | -0.001358 | -2.562539 | -1.757555 |
| C                  | 0.666704  | 0.455724  | 1.015871  | H                  | -1.222620 | -3.367050 | 0.210393  |
| C                  | -0.666704 | -0.455724 | 1.015871  | H                  | 1.224094  | -3.366161 | 0.208107  |
| C                  | -0.633855 | 0.927331  | 0.437854  | F                  | -0.000017 | -4.977230 | -1.218253 |

|                    |           |           |           |                    |           |           |           |
|--------------------|-----------|-----------|-----------|--------------------|-----------|-----------|-----------|
| Si                 | -0.000017 | 3.488740  | -0.608148 | H                  | 3.704080  | 0.796348  | 0.570061  |
| Si                 | 0.000017  | -3.488740 | -0.608148 | H                  | 2.086712  | 3.165097  | 0.555187  |
|                    |           |           |           | H                  | 2.052633  | 1.390921  | -1.710964 |
|                    |           |           |           | F                  | 4.350102  | 2.963126  | -1.152554 |
| <b>[2.1.1]-2Ge</b> |           |           |           | H                  | -2.052633 | -1.390921 | -1.710964 |
| C                  | 0.666485  | 0.455385  | 0.815607  | H                  | -3.704080 | -0.796348 | 0.570061  |
| C                  | -0.666485 | -0.455385 | 0.815607  | H                  | -2.086712 | -3.165097 | 0.555187  |
| C                  | -0.634335 | 0.928340  | 0.235807  | F                  | -4.350102 | -2.963126 | -1.152554 |
| H                  | -1.170989 | 1.713759  | 0.754786  | Sn                 | -2.887286 | -1.969488 | -0.348394 |
| H                  | -0.676318 | 0.989696  | -0.846222 |                    |           |           |           |
| C                  | 0.634335  | -0.928340 | 0.235807  | <b>[2.1.1]-2Pb</b> |           |           |           |
| H                  | 1.170989  | -1.713759 | 0.754786  | C                  | -0.001685 | -0.806414 | 1.045038  |
| H                  | 0.676318  | -0.989696 | -0.846222 | C                  | 0.001685  | 0.806414  | 1.045038  |
| C                  | -0.634335 | -0.433567 | 2.361933  | C                  | 1.125748  | -0.002267 | 0.463541  |
| C                  | 0.634335  | 0.433567  | 2.361933  | H                  | 2.076982  | -0.004338 | 0.982230  |
| H                  | -0.523089 | -1.428014 | 2.788983  | H                  | 1.198552  | -0.002338 | -0.618733 |
| H                  | 0.523089  | 1.428014  | 2.788983  | C                  | -1.125748 | 0.002267  | 0.463541  |
| H                  | -1.520457 | 0.030985  | 2.789295  | H                  | -2.076982 | 0.004338  | 0.982230  |
| H                  | 1.520457  | -0.030985 | 2.789295  | H                  | -1.198552 | 0.002338  | -0.618733 |
| H                  | 3.573211  | 0.888229  | 0.380413  | C                  | 0.001610  | 0.768207  | 2.592301  |
| H                  | 2.130509  | 3.003950  | 0.381413  | C                  | -0.001610 | -0.768207 | 2.592301  |
| H                  | 2.105314  | 1.438057  | -1.649589 | H                  | -0.881319 | 1.238984  | 3.018948  |
| F                  | 4.219128  | 2.879038  | -1.169902 | H                  | 0.881319  | -1.238984 | 3.018948  |
| H                  | -2.105314 | -1.438057 | -1.649589 | H                  | 0.886507  | 1.235330  | 3.018873  |
| H                  | -3.573211 | -0.888229 | 0.380413  | H                  | -0.886507 | -1.235330 | 3.018873  |
| H                  | -2.130509 | -3.003950 | 0.381413  | H                  | -1.472416 | -3.662926 | 0.677918  |
| F                  | -4.219128 | -2.879038 | -1.169902 | H                  | 1.494660  | -3.648858 | 0.638558  |
| Ge                 | 2.894912  | 1.975845  | -0.454689 | H                  | -0.025210 | -2.595341 | -1.688945 |
| Ge                 | -2.894912 | -1.975845 | -0.454689 | F                  | -0.004291 | -5.453550 | -1.100904 |
|                    |           |           |           | H                  | 0.025210  | 2.595341  | -1.688945 |
|                    |           |           |           | H                  | 1.472416  | 3.662926  | 0.677918  |
| <b>[2.1.1]-2Sn</b> |           |           |           | H                  | -1.494660 | 3.648858  | 0.638558  |
| C                  | 0.666715  | 0.455188  | 0.925804  | F                  | 0.004291  | 5.453550  | -1.100904 |
| C                  | -0.666715 | -0.455188 | 0.925804  | Pb                 | 0.001610  | 3.583241  | -0.252756 |
| C                  | -0.634513 | 0.929304  | 0.344749  | Pb                 | -0.001610 | -3.583241 | -0.252756 |
| H                  | -1.170970 | 1.715079  | 0.862906  |                    |           |           |           |
| H                  | -0.674221 | 0.987301  | -0.737646 | <b>[2.2.1]-2C</b>  |           |           |           |
| C                  | 0.634513  | -0.929304 | 0.344749  | C                  | -0.678904 | -0.386631 | -0.411212 |
| H                  | 1.170970  | -1.715079 | 0.862906  | C                  | 0.678904  | 0.386631  | -0.411212 |
| H                  | 0.674221  | -0.987301 | -0.737646 | C                  | 0.000000  | 0.000000  | 0.852086  |
| C                  | -0.634513 | -0.433364 | 2.472244  | H                  | -0.450595 | 0.790241  | 1.440503  |
| C                  | 0.634513  | 0.433364  | 2.472244  | H                  | 0.450595  | -0.790241 | 1.440503  |
| H                  | -0.523102 | -1.428100 | 2.898049  | H                  | 0.032311  | 2.518868  | -0.572644 |
| H                  | 0.523102  | 1.428100  | 2.898049  | H                  | -1.697127 | 0.552537  | -2.117358 |
| H                  | -1.520553 | 0.032023  | 2.898336  | C                  | 0.000000  | -1.571793 | -1.115178 |
| H                  | 1.520553  | -0.032023 | 2.898336  | C                  | 1.352548  | -0.801628 | -1.114713 |

|                    |           |           |           |    |           |           |          |
|--------------------|-----------|-----------|-----------|----|-----------|-----------|----------|
| C                  | -1.352548 | 0.801628  | -1.114713 | Si | -0.000070 | 3.486366  | 0.694821 |
| C                  | 0.000000  | 1.571793  | -1.115178 | Si | 0.000070  | -3.486366 | 0.694821 |
| H                  | -0.389671 | -1.740472 | -2.118096 |    |           |           |          |
| H                  | 1.697127  | -0.552537 | -2.117358 |    |           |           |          |
| H                  | -0.032311 | -2.518868 | -0.572644 |    |           |           |          |
| H                  | 2.183005  | -1.257162 | -0.571576 |    |           |           |          |
| H                  | 0.389671  | 1.740472  | -2.118096 |    |           |           |          |
| H                  | -2.183005 | 1.257162  | -0.571576 |    |           |           |          |
| H                  | 3.065030  | 1.927395  | -0.324152 |    |           |           |          |
| H                  | 2.217383  | 2.365809  | 1.184480  |    |           |           |          |
| H                  | 3.190060  | 0.871644  | 1.110197  |    |           |           |          |
| F                  | 4.224139  | 2.606637  | 1.185016  |    |           |           |          |
| H                  | -2.217383 | -2.365809 | 1.184480  |    |           |           |          |
| H                  | -3.065030 | -1.927395 | -0.324152 |    |           |           |          |
| H                  | -3.190060 | -0.871644 | 1.110197  |    |           |           |          |
| F                  | -4.224139 | -2.606637 | 1.185016  |    |           |           |          |
| C                  | -3.112045 | -1.903489 | 0.765644  |    |           |           |          |
| C                  | 3.112045  | 1.903489  | 0.765644  |    |           |           |          |
| <b>[2.2.1]-2Si</b> |           |           |           |    |           |           |          |
| C                  | 0.000006  | 0.796683  | -0.608275 |    |           |           |          |
| C                  | -0.000006 | -0.796683 | -0.608275 |    |           |           |          |
| C                  | 0.000000  | 0.000000  | 0.644965  |    |           |           |          |
| H                  | 0.910518  | 0.000013  | 1.231866  |    |           |           |          |
| H                  | -0.910518 | -0.000013 | 1.231866  |    |           |           |          |
| H                  | 2.168369  | -1.267564 | -0.789335 |    |           |           |          |
| H                  | 1.300219  | 1.205140  | -2.328042 |    |           |           |          |
| C                  | -1.357455 | 0.775486  | -1.329443 |    |           |           |          |
| C                  | -1.357457 | -0.775463 | -1.329444 |    |           |           |          |
| C                  | 1.357457  | 0.775463  | -1.329444 |    |           |           |          |
| C                  | 1.357455  | -0.775486 | -1.329443 |    |           |           |          |
| H                  | -1.300249 | 1.205173  | -2.328036 |    |           |           |          |
| H                  | -1.300219 | -1.205140 | -2.328042 |    |           |           |          |
| H                  | -2.168369 | 1.267564  | -0.789335 |    |           |           |          |
| H                  | -2.168404 | -1.267535 | -0.789372 |    |           |           |          |
| H                  | 1.300249  | -1.205173 | -2.328036 |    |           |           |          |
| H                  | 2.168404  | 1.267535  | -0.789372 |    |           |           |          |
| H                  | 0.000460  | -3.577293 | -0.779491 |    |           |           |          |
| H                  | 1.224126  | -2.836326 | 1.203158  |    |           |           |          |
| H                  | -1.224365 | -2.836526 | 1.202493  |    |           |           |          |
| F                  | 0.000000  | -4.991227 | 1.257483  |    |           |           |          |
| H                  | -1.224126 | 2.836326  | 1.203158  |    |           |           |          |
| H                  | -0.000460 | 3.577293  | -0.779491 |    |           |           |          |
| H                  | 1.224365  | 2.836526  | 1.202493  |    |           |           |          |
| F                  | 0.000000  | 4.991227  | 1.257483  |    |           |           |          |
| <b>[2.2.1]-2Ge</b> |           |           |           |    |           |           |          |
| C                  | 0.000007  | 0.794562  | -0.798750 |    |           |           |          |
| C                  | -0.000007 | -0.794562 | -0.798750 |    |           |           |          |
| C                  | 0.000000  | 0.000000  | 0.456537  |    |           |           |          |
| H                  | 0.910674  | 0.000004  | 1.043468  |    |           |           |          |
| H                  | -0.910674 | -0.000004 | 1.043468  |    |           |           |          |
| H                  | 2.169850  | -1.267247 | -0.977560 |    |           |           |          |
| H                  | 1.302918  | 1.204943  | -2.516908 |    |           |           |          |
| C                  | -1.358997 | 0.775584  | -1.518210 |    |           |           |          |
| C                  | -1.358997 | -0.775567 | -1.518211 |    |           |           |          |
| C                  | 1.358997  | 0.775567  | -1.518211 |    |           |           |          |
| C                  | 1.358997  | -0.775584 | -1.518210 |    |           |           |          |
| H                  | -1.302922 | 1.204957  | -2.516902 |    |           |           |          |
| H                  | -1.302918 | -1.204943 | -2.516908 |    |           |           |          |
| H                  | -2.169850 | 1.267247  | -0.977560 |    |           |           |          |
| H                  | -2.169888 | -1.267236 | -0.977607 |    |           |           |          |
| H                  | 1.302922  | -1.204957 | -2.516902 |    |           |           |          |
| H                  | 2.169888  | 1.267236  | -0.977607 |    |           |           |          |
| H                  | 0.000298  | -3.660929 | -1.012655 |    |           |           |          |
| H                  | 1.281416  | -2.885369 | 1.062718  |    |           |           |          |
| H                  | -1.281652 | -2.885549 | 1.062243  |    |           |           |          |
| F                  | 0.000000  | -5.155157 | 1.124568  |    |           |           |          |
| H                  | -1.281416 | 2.885369  | 1.062718  |    |           |           |          |
| H                  | -0.000298 | 3.660929  | -1.012655 |    |           |           |          |
| H                  | 1.281652  | 2.885549  | 1.062243  |    |           |           |          |
| F                  | 0.000000  | 5.155157  | 1.124568  |    |           |           |          |
| Ge                 | -0.000028 | 3.513637  | 0.511047  |    |           |           |          |
| Ge                 | 0.000028  | -3.513637 | 0.511047  |    |           |           |          |
| <b>[2.2.1]-2Sn</b> |           |           |           |    |           |           |          |
| C                  | 0.000169  | 0.799770  | -0.922032 |    |           |           |          |
| C                  | -0.000169 | -0.799770 | -0.922032 |    |           |           |          |
| C                  | 0.000000  | 0.000000  | 0.331222  |    |           |           |          |
| H                  | 0.911355  | -0.000117 | 0.917283  |    |           |           |          |
| H                  | -0.911355 | 0.000117  | 0.917283  |    |           |           |          |
| H                  | 2.170007  | -1.263604 | -1.108880 |    |           |           |          |
| H                  | 1.297157  | 1.206358  | -2.644722 |    |           |           |          |
| C                  | -1.356805 | 0.774605  | -1.648038 |    |           |           |          |
| C                  | -1.357213 | -0.774146 | -1.647838 |    |           |           |          |
| C                  | 1.357213  | 0.774146  | -1.647838 |    |           |           |          |
| C                  | 1.356805  | -0.774605 | -1.648038 |    |           |           |          |
| H                  | -1.296330 | 1.206407  | -2.645082 |    |           |           |          |

|    |           |           |           |   |           |           |           |
|----|-----------|-----------|-----------|---|-----------|-----------|-----------|
| H  | -1.297157 | -1.206358 | -2.644722 | C | 0.145888  | 0.460621  | 0.000000  |
| H  | -2.170007 | 1.263604  | -1.108880 | C | 1.136630  | -0.732695 | 0.000000  |
| H  | -2.170650 | -1.262513 | -1.108442 | C | 0.145888  | -0.555015 | 1.123072  |
| H  | 1.296330  | -1.206407 | -2.645082 | H | 0.530976  | -0.231787 | 2.082194  |
| H  | 2.170650  | 1.262513  | -1.108442 | H | -0.689280 | -1.243331 | 1.166402  |
| H  | -0.018012 | -3.751561 | -1.278486 | C | 1.645653  | 0.684346  | 0.000000  |
| H  | 1.445566  | -2.884316 | 1.030139  | C | 0.145888  | -0.555015 | -1.123072 |
| H  | -1.428862 | -2.875917 | 1.059302  | H | 2.088525  | 1.056364  | -0.915493 |
| F  | 0.001699  | -5.338806 | 1.087601  | H | 2.088525  | 1.056364  | 0.915493  |
| H  | -1.445566 | 2.884316  | 1.030139  | H | 0.530976  | -0.231787 | -2.082194 |
| H  | 0.018012  | 3.751561  | -1.278486 | H | -0.689280 | -1.243331 | -1.166402 |
| H  | 1.428862  | 2.875917  | 1.059302  | H | 0.321509  | -3.663670 | 0.000000  |
| F  | -0.001699 | 5.338806  | 1.087601  | H | 1.865477  | -3.586867 | 0.892149  |
| Sn | 0.000000  | 3.523262  | 0.406085  | H | 1.865477  | -3.586867 | -0.892149 |
| Sn | 0.000000  | -3.523262 | 0.406085  | F | 1.433253  | -5.348892 | 0.000000  |

### [2.2.1]-2Pb

|    |           |           |           |
|----|-----------|-----------|-----------|
| C  | -0.000014 | -0.795845 | -1.052291 |
| C  | 0.000014  | 0.795845  | -1.052291 |
| C  | 0.000000  | 0.000000  | 0.204033  |
| H  | -0.911225 | -0.000007 | 0.790563  |
| H  | 0.911225  | 0.000007  | 0.790563  |
| H  | -2.172852 | 1.263854  | -1.235612 |
| H  | -1.301541 | -1.205073 | -2.772503 |
| C  | 1.359413  | -0.774833 | -1.774661 |
| C  | 1.359469  | 0.774807  | -1.774599 |
| C  | -1.359469 | -0.774807 | -1.774599 |
| C  | -1.359413 | 0.774833  | -1.774661 |
| H  | 1.301379  | -1.204985 | -2.772607 |
| H  | 1.301541  | 1.205073  | -2.772503 |
| H  | 2.172852  | -1.263854 | -1.235612 |
| H  | 2.172900  | 1.263714  | -1.235435 |
| H  | -1.301379 | 1.204985  | -2.772607 |
| H  | -2.172900 | -1.263714 | -1.235435 |
| H  | -0.000173 | 3.896340  | -1.418318 |
| H  | -1.486728 | 2.991384  | 0.982905  |
| H  | 1.486772  | 2.991140  | 0.982593  |
| F  | 0.000242  | 5.509003  | 1.021971  |
| H  | 1.486728  | -2.991384 | 0.982905  |
| H  | 0.000173  | -3.896340 | -1.418318 |
| H  | -1.486772 | -2.991140 | 0.982593  |
| F  | -0.000242 | -5.509003 | 1.021971  |
| Pb | 0.000000  | 3.591728  | 0.298511  |
| Pb | 0.000000  | -3.591728 | 0.298511  |

### [1.1.1]-CSi

|    |           |           |           |
|----|-----------|-----------|-----------|
| Si | -1.573930 | 2.958904  | 0.000000  |
| H  | -0.747377 | 3.001753  | 1.222187  |
| H  | -0.747377 | 3.001753  | -1.222187 |
| H  | -2.496585 | 1.807313  | 0.000000  |
| F  | -2.479881 | 4.287384  | 0.000000  |
| C  | 1.368904  | -3.970073 | 0.000000  |

### [1.1.1]-CGe

|    |           |           |           |
|----|-----------|-----------|-----------|
| C  | -0.123226 | 0.576478  | 0.000000  |
| C  | 0.879280  | 1.758781  | 0.000000  |
| C  | 0.879280  | 0.754993  | 1.123312  |
| H  | 0.494282  | 1.078098  | 2.082481  |
| H  | 1.702080  | 0.051907  | 1.166141  |
| C  | -0.604198 | 2.014913  | 0.000000  |
| C  | 0.879280  | 0.754993  | -1.123312 |
| H  | -1.046746 | 2.387167  | -0.915502 |
| H  | -1.046746 | 2.387167  | 0.915502  |
| H  | 0.494282  | 1.078098  | -2.082481 |
| H  | 1.702080  | 0.051907  | -1.166141 |
| H  | 3.941185  | 1.454905  | 0.000000  |
| H  | 3.579790  | 2.958541  | 0.892201  |
| H  | 3.579790  | 2.958541  | -0.892201 |
| F  | 5.390781  | 2.859023  | 0.000000  |
| H  | -2.350328 | -1.031884 | 1.280428  |
| H  | -2.350328 | -1.031884 | -1.280428 |
| H  | -0.611565 | -2.407968 | 0.000000  |
| F  | -3.102339 | -3.174227 | 0.000000  |
| C  | 4.047922  | 2.541076  | 0.000000  |
| Ge | -2.013556 | -1.797036 | 0.000000  |

### [1.1.1]-CSn

|    |           |           |           | <b>[1.1.1]-CPb</b> |           |           |           |
|----|-----------|-----------|-----------|--------------------|-----------|-----------|-----------|
| C  | 0.215395  | 0.826314  | 0.000000  | C                  | 1.221176  | 0.559573  | -0.008217 |
| C  | 1.223897  | 2.001037  | 0.000000  | C                  | 2.731419  | 0.901478  | 0.016636  |
| C  | 1.223897  | 1.003760  | 1.124153  | C                  | 2.096600  | 0.190241  | 1.178736  |
| H  | 0.839354  | 1.328634  | 2.082809  | H                  | 1.951299  | 0.753333  | 2.092127  |
| H  | 2.041397  | 0.294630  | 1.166164  | H                  | 2.327055  | -0.859683 | 1.311083  |
| C  | -0.252706 | 2.273899  | 0.000000  | C                  | 1.710682  | 1.996731  | -0.103792 |
| C  | 1.223897  | 1.003760  | -1.124153 | C                  | 2.171972  | 0.014978  | -1.061437 |
| H  | -0.693365 | 2.647178  | -0.915895 | H                  | 1.612780  | 2.486571  | -1.064461 |
| H  | -0.693365 | 2.647178  | 0.915895  | H                  | 1.550246  | 2.629040  | 0.760427  |
| H  | 0.839354  | 1.328634  | -2.082809 | H                  | 2.091493  | 0.428967  | -2.058775 |
| H  | 2.041397  | 0.294630  | -1.166164 | H                  | 2.406344  | -1.041313 | -1.013462 |
| H  | 4.292616  | 1.667711  | 0.000000  | H                  | 4.971570  | -1.151253 | 0.291869  |
| H  | 3.934540  | 3.172392  | 0.892319  | H                  | 5.717450  | 0.421389  | 0.686259  |
| H  | 3.934540  | 3.172392  | -0.892319 | H                  | 5.509158  | -0.063587 | -1.018763 |
| F  | 5.744625  | 3.068571  | 0.000000  | F                  | 6.964940  | -1.016645 | 0.007554  |
| H  | -2.114849 | -0.657056 | 1.437786  | H                  | -1.703057 | 0.962009  | 1.369773  |
| H  | -2.114849 | -0.657056 | -1.437786 | H                  | -1.641858 | 0.614527  | -1.580600 |
| H  | -0.205770 | -2.254753 | 0.000000  | H                  | -1.115968 | -1.703792 | 0.199911  |
| F  | -2.956220 | -2.956072 | 0.000000  | F                  | -3.791118 | -0.554274 | 0.008371  |
| C  | 4.401760  | 2.753795  | 0.000000  | C                  | 5.722357  | -0.418574 | -0.009524 |
| Sn | -1.708270 | -1.463448 | 0.000000  | Pb                 | -1.782514 | -0.107372 | -0.002355 |
